# Supplementary material
Source: Springer Nature journal article supplement (https://www.springermedizin.de/resource/supplementary/12913_2013_2895_MOESM2_ESM.pdf/9531804)

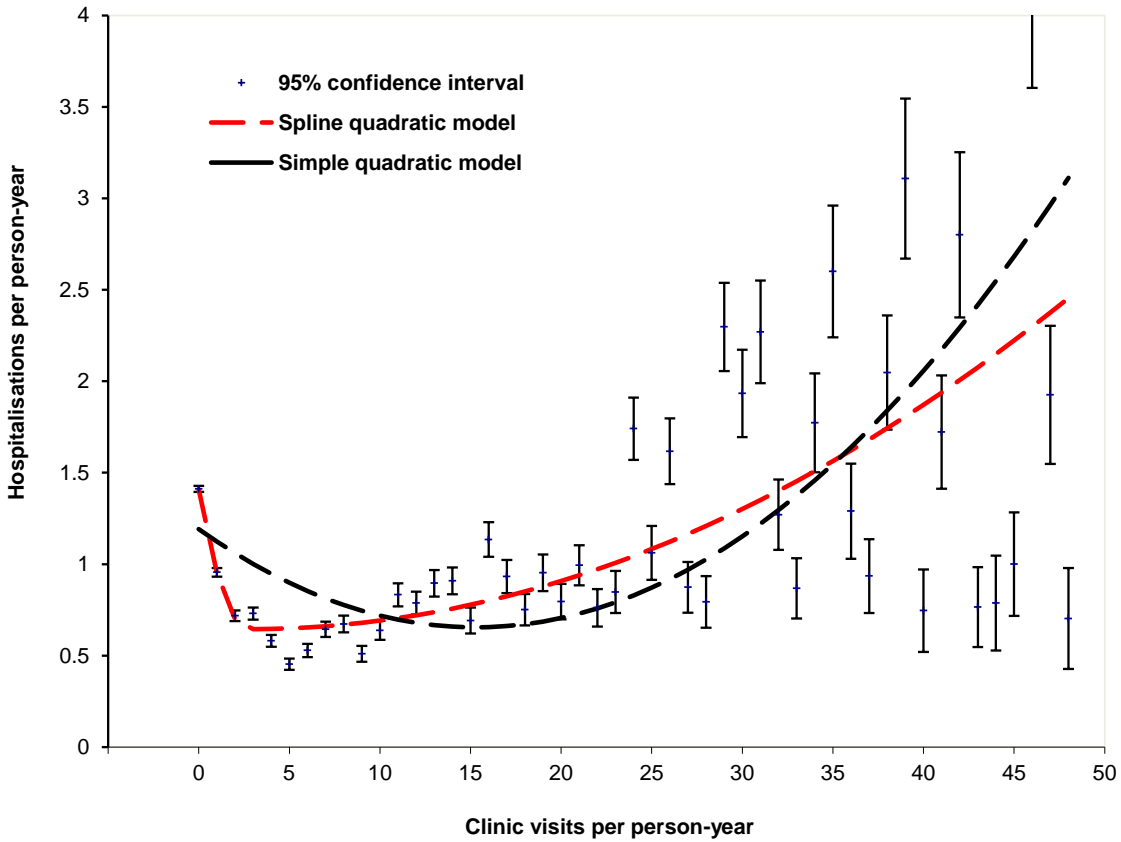

Supplement: MOESM2 [file 9531804]
